# Supplementary material
Source: MDPI journal article supplement (https://www.mdpi.com/2227-9040/9/12/334)
Supplement: s1 [file s1]

## Supplementary Information

# Cost-Effective Foam-Based Colorimetric Sensor for Roadside Testing of Alcohol in Undiluted Saliva

Krittapas Kaewnu <sup>1,2</sup>, Kiattisak Promsuwan <sup>1,2,3,4</sup>, Apichai Phonchai <sup>1,2</sup>, Adul Thiangchanya <sup>1</sup>, Dongsayam Somapa <sup>5</sup>, Namchoke Somapa <sup>5</sup>, Kunanunt Tayayuth <sup>6</sup> and Warakorn Limbut <sup>1,2,3,4,\*</sup>

<sup>1</sup> Division of Health and Applied Sciences, Faculty of Science, Prince of Songkla University, Hat Yai, Songkhla 90112, Thailand; k.kaewnu.psu@gmail.com (K.K.); promsuwan.k@gmail.com (K.P.); apichai.ph@psu.ac.th (A.P.); adul.t@psu.ac.th (A.T.)

<sup>2</sup> Forensic Science Innovation and Service Center, Prince of Songkla University, Hat Yai, Songkhla 90112, Thailand

<sup>3</sup> Center of Excellence for Trace Analysis and Biosensors (TAB-CoE), Prince of Songkla University, Hat Yai, Songkhla 90112, Thailand

<sup>4</sup> Center of Excellence for Innovation in Chemistry, Faculty of Science, Prince of Songkla University, Hat Yai, Songkhla 90112, Thailand

<sup>5</sup> Master Lab Incorporation Company Limited. 12 Prayasuren, 35 Bangchun Klongsamwa, Bangkok 10510, Thailand; Dongsayam.s@somapait.com (D.S.); Namchoke.s@somapait.com (N.S.)

<sup>6</sup> Science Park, Hat Yai campus of extension Southern Institute of Science Park, Prince of Songkla University, Moo 6, Thung Yai, Hat Yai, Songkhla 90110, Thailand; Kunanunt@gmail.com

\* Correspondence: warakorn.l@psu.ac.th; Tel.: +66-74-288-563

**Table S1.** Effect of indicator concentration (n = 6).

| Concentration of<br>$K_2Cr_2O_7$ (molL <sup>-1</sup> ) | Concentration of alcohol (% v/v)                                                    |                                                                                     |                                                                                     |                                                                                       |                                                                                       |
|--------------------------------------------------------|-------------------------------------------------------------------------------------|-------------------------------------------------------------------------------------|-------------------------------------------------------------------------------------|---------------------------------------------------------------------------------------|---------------------------------------------------------------------------------------|
|                                                        | 0.00                                                                                | 0.10                                                                                | 0.50                                                                                | 1.00                                                                                  | 5.00                                                                                  |
| Blank )H <sub>2</sub> O(                               |  |  |  |  |  |
| 0.01                                                   |  |  |  |  |  |
| 0.025                                                  |  |  |  |  |  |
| 0.05                                                   |  |  |  |  |  |
| 0.075                                                  |  |  |  |  |  |
| 0.10                                                   |  |  |  |  |  |
| 0.25                                                   |  |  |  |  |  |
| 0.50                                                   |  |  |  |  |  |

**Table S2.** Effect of sulfuric acid concentration (n = 6).

| Concentration of<br>$\text{H}_2\text{SO}_4$ (molL <sup>-1</sup> ) | Concentration of alcohol (% v/v)                                                  |                                                                                   |                                                                                   |                                                                                     |                                                                                     |
|-------------------------------------------------------------------|-----------------------------------------------------------------------------------|-----------------------------------------------------------------------------------|-----------------------------------------------------------------------------------|-------------------------------------------------------------------------------------|-------------------------------------------------------------------------------------|
|                                                                   | 0.00                                                                              | 0.10                                                                              | 0.50                                                                              | 1.0                                                                                 | 5.0                                                                                 |
| 1.0                                                               |  |  |  |  |  |
| 2.5                                                               |  |  |  |  |  |
| 5.0                                                               |  |  |  |  |  |
| 7.5                                                               |  |  |  |  |  |

**Table S3.** Effect of adsorption time (n = 6).

| Adsorption time<br>(min) | Concentration of alcohol (% v/v)                                                    |                                                                                     |                                                                                      |                                                                                       |                                                                                       |
|--------------------------|-------------------------------------------------------------------------------------|-------------------------------------------------------------------------------------|--------------------------------------------------------------------------------------|---------------------------------------------------------------------------------------|---------------------------------------------------------------------------------------|
|                          | 0.00                                                                                | 0.10                                                                                | 0.50                                                                                 | 1.0                                                                                   | 5.0                                                                                   |
| 30                       |  |  |  |  |  |
| 60                       |  |  |  |  |  |
| 120                      |  |  |  |  |  |
| 180                      |  |  |  |  |  |
| 240                      |  |  |  |  |  |

**Table S4.** Effect of sample volume the reaction (n = 6).

| Indicator solution:<br><br>Alcohol (μL) | Concentration of alcohol (% v/v)                                                   |                                                                                    |                                                                                    |                                                                                      |                                                                                      |
|-----------------------------------------|------------------------------------------------------------------------------------|------------------------------------------------------------------------------------|------------------------------------------------------------------------------------|--------------------------------------------------------------------------------------|--------------------------------------------------------------------------------------|
|                                         | 0.00                                                                               | 0.10                                                                               | 0.50                                                                               | 1.0                                                                                  | 5.0                                                                                  |
| 10                                      |   |   |   |   |   |
| 20                                      |   |   |   |   |   |
| 30                                      |   |   |   |   |   |
| 40                                      |   |   |   |   |   |
| 50                                      |  |  |  |  |  |

**Table S5.** Effect of potential interferences on the analytical determination of alcohol (n = 6).

| Potential interference | Normal concentration (g/L) | Added concentration (g/L) | Tolerance ratio (fold) | Color of the foam-based colorimetric alcohol sensor |
|------------------------|----------------------------|---------------------------|------------------------|-----------------------------------------------------|
| Ammonium nitrate       | 0.320                      | 524.80                    | 1640                   | No change                                           |
| Sodium chloride        | 0.159                      | 239.10                    | 1500                   | No change                                           |
| Potassium Chloride     | 0.202                      | 222.20                    | 1100                   | No change                                           |
| Urea                   | 0.198                      | 198.00                    | 1000                   | No change                                           |
| Potassium phosphate    | 0.260                      | 208.00                    | 800                    | No change                                           |
| Ammonium chloride      | 5.349                      | 288.85                    | 54                     | No change                                           |
| Sucrose                | 3.423                      | 116.38                    | 34                     | No change                                           |
| Lactose                | 3.423                      | 116.38                    | 34                     | No change                                           |
| Glucose                | 1.802                      | 32.44                     | 18                     | No change                                           |
| Fructose               | 1.802                      | 32.44                     | 18                     | No change                                           |
| Galactose              | 1.802                      | 32.44                     | 18                     | No change                                           |
| Sodium nitrate         | 0.690                      | 4.83                      | 7                      | No change                                           |
| Ascorbic acid          | 0.176                      | 0.35                      | 2                      | No change                                           |
